# Supplementary material for: Lolium perenne apoplast metabolomics for identification of novel metabolites produced by the symbiotic fungus Epichloë festucae
Source: PubMed Central journal article supplement (PMC7317419; doi:10.1111/nph.16528), 2020-04-13
Supplement: NPH-227-559-s001.pdf [file NPH-227-559-s001.pdf]

***New Phytologist* Supporting Information**

Article title: *Lolium perenne* apoplast metabolomics for identification of novel metabolites produced by the symbiotic fungus *Epichloë festucae*

Authors: Kimberly A. Green, Daniel Berry, Kirstin Feussner, Carla J. Eaton, Arvina Ram, Carl H. Mesarich, Peter Solomon, Ivo Feussner and Barry Scott

Article acceptance date: 28 February 2020

The following Supporting Information is available for this article:

**a**

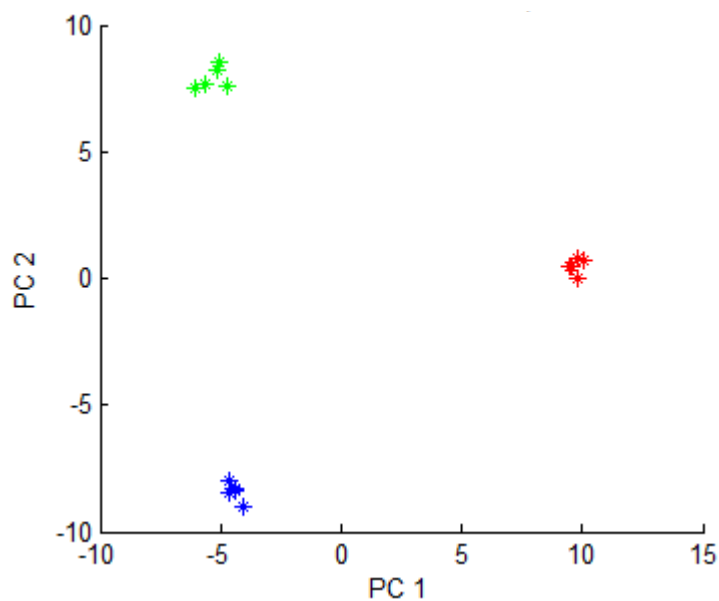

**b**

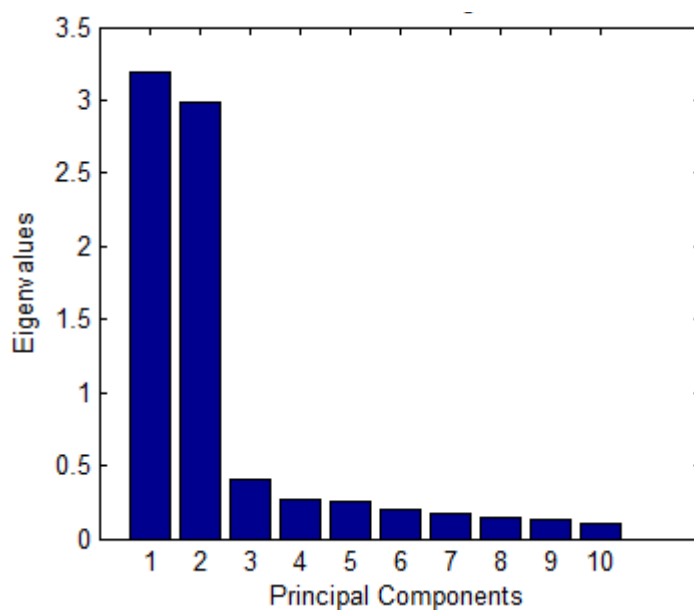

**Fig. S1** Principle component analysis (PCA) of 203 metabolite features with a false discovery rate of  $< 0.003$ , obtained by metabolite fingerprinting using ultra-performance liquid chromatography-electrospray-ionisation-time-of-flight mass spectrometry (UPLC-ESI-TOF-MS) analysis of apoplastic wash fluids from mock-treated (blue), or F11 (red)- or CT (green)-infected *L. perenne*. (a) PCA scores plot and (b) PCA eigen values are shown. Five biological replicates per condition were used for the analysis.

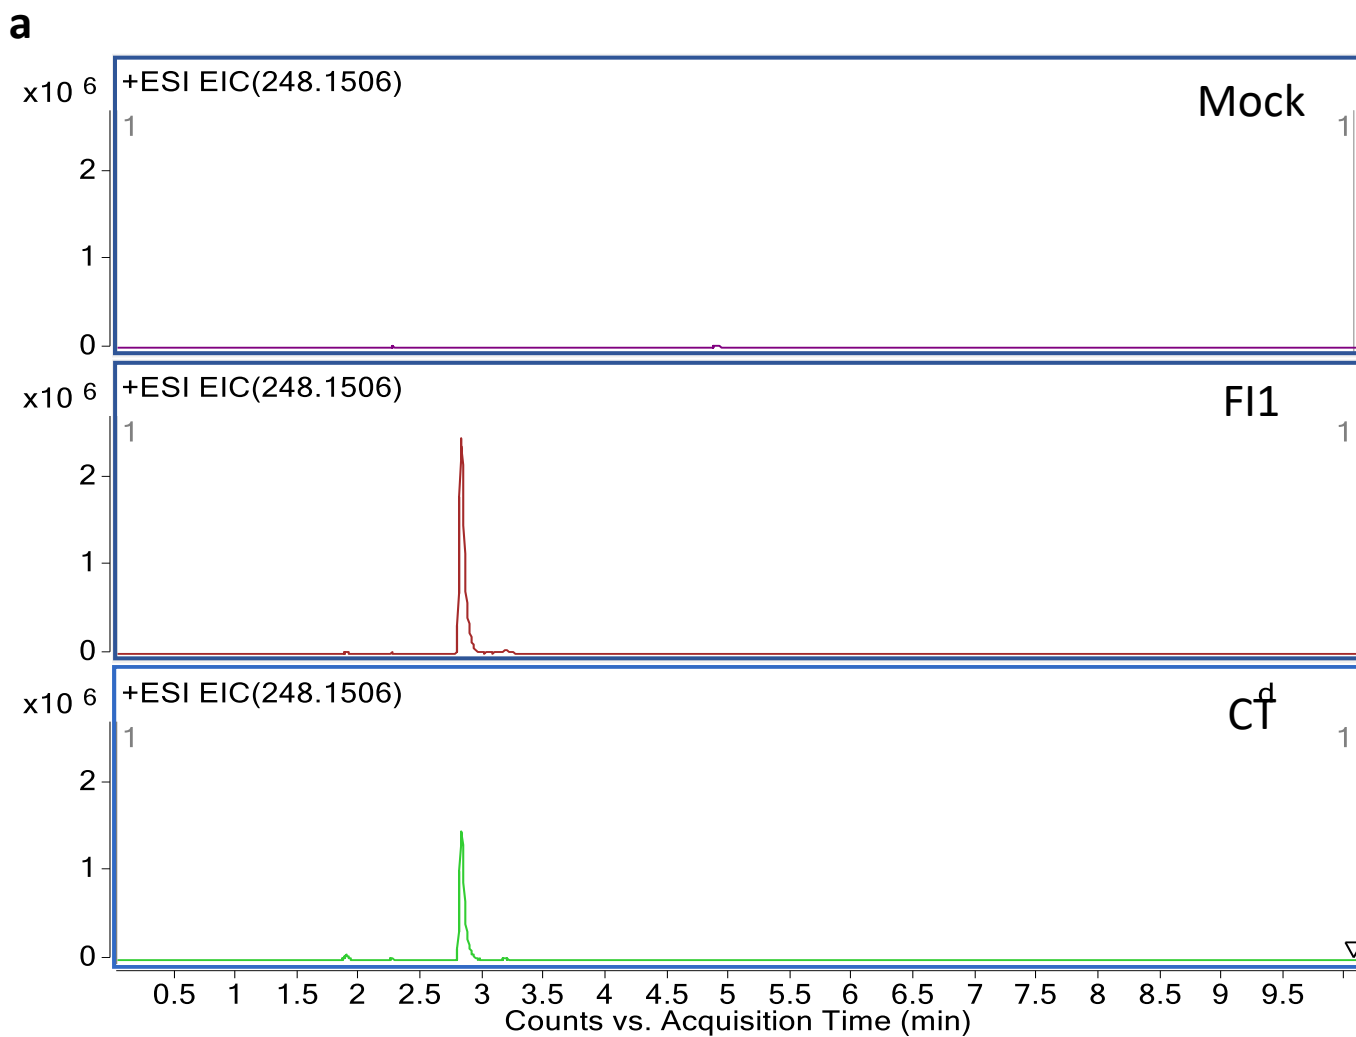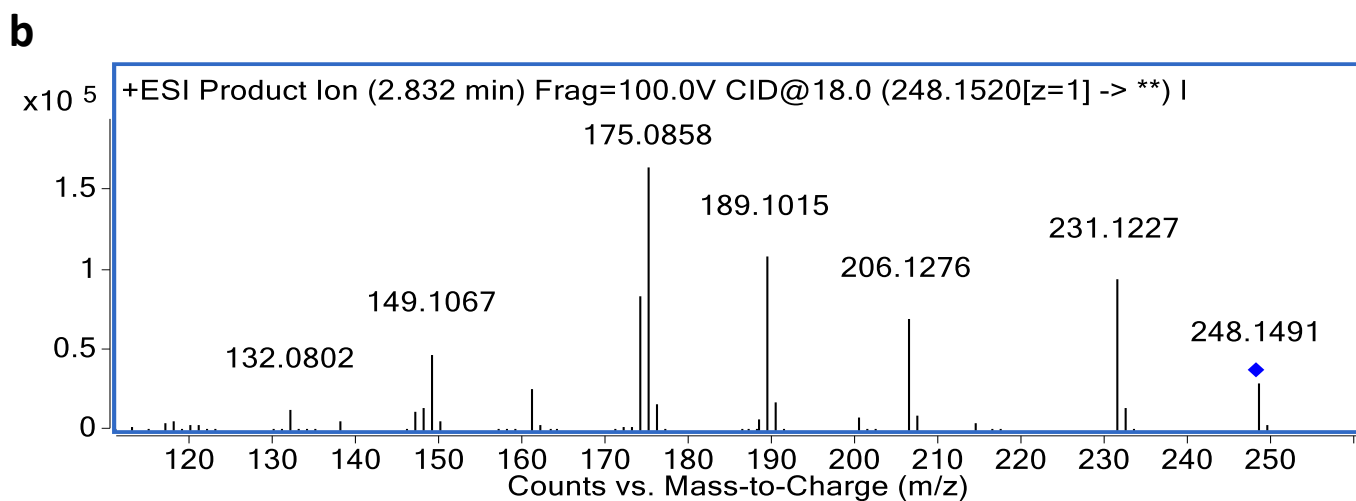

**Fig. S2** Extracted ion chromatogram of peramine ( $[M+H]^+$  248.1506) in FI1 and CT (a) and confirmation of the peramine structure by ultra high-performance liquid chromatography-

quadrupole time-of-flight mass spectrometry/mass spectrometry (UHPLC-QTOF-MS/MS) analysis. (b) Data are representative for five biological replicates per condition.

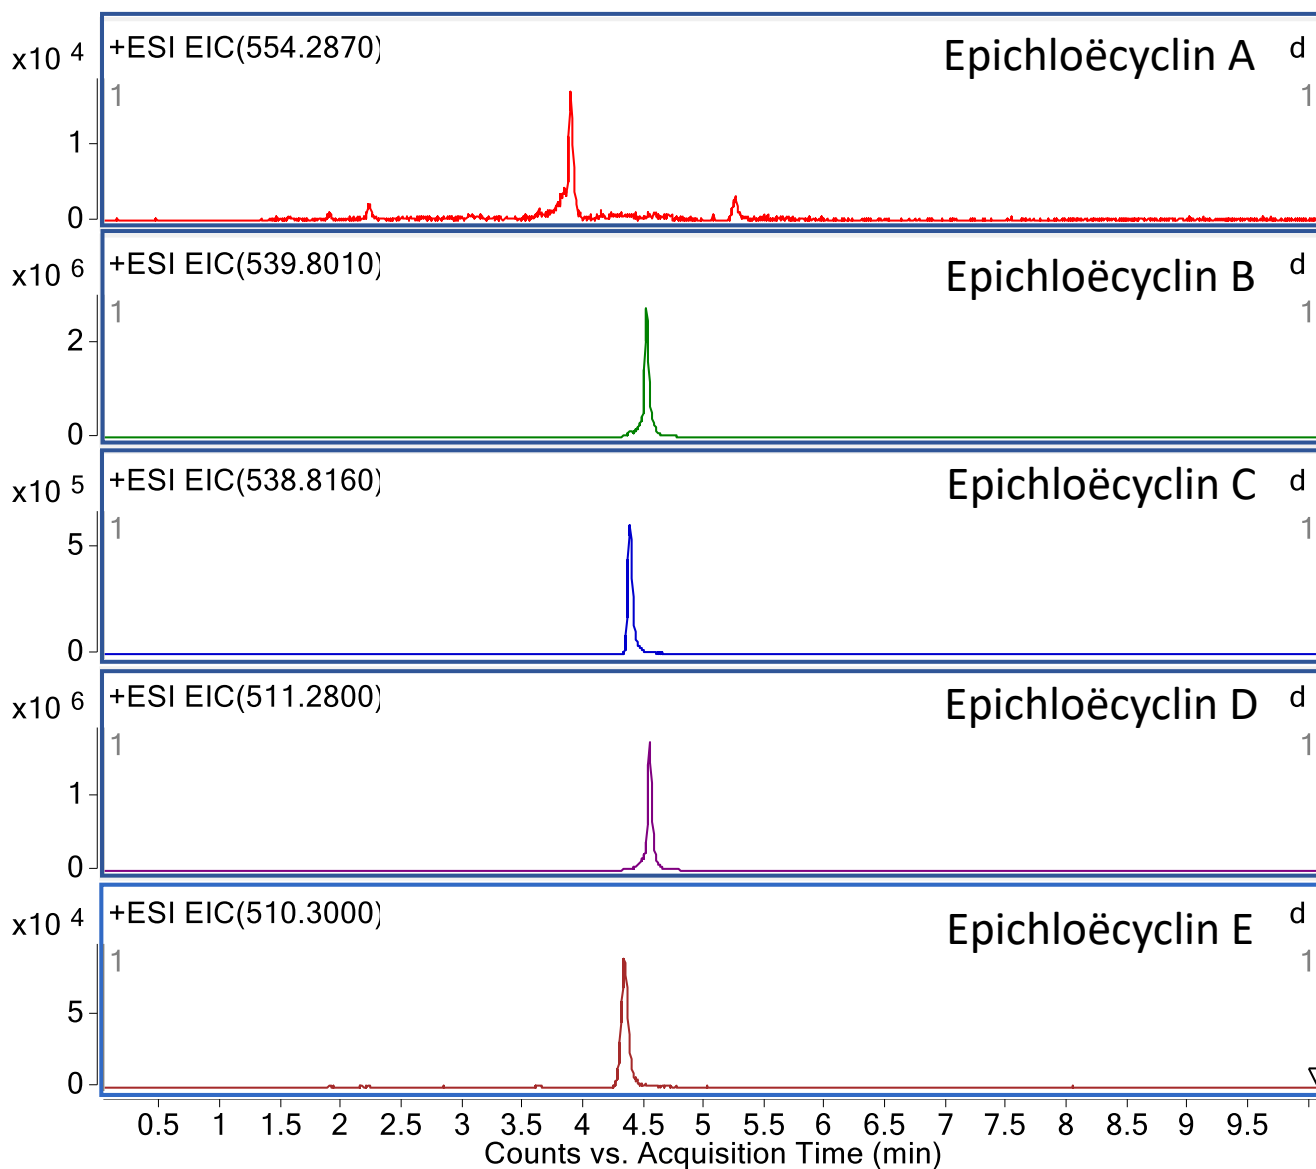

**Fig. S3** Extracted ion chromatogram of epichloëcyclins A-E, obtained by ultra high-performance liquid chromatography-quadrupole time-of-flight-mass spectrometry (UHPLC-QTOF-MS) analysis of F11 samples. Data are representative for five biological replicates per condition.

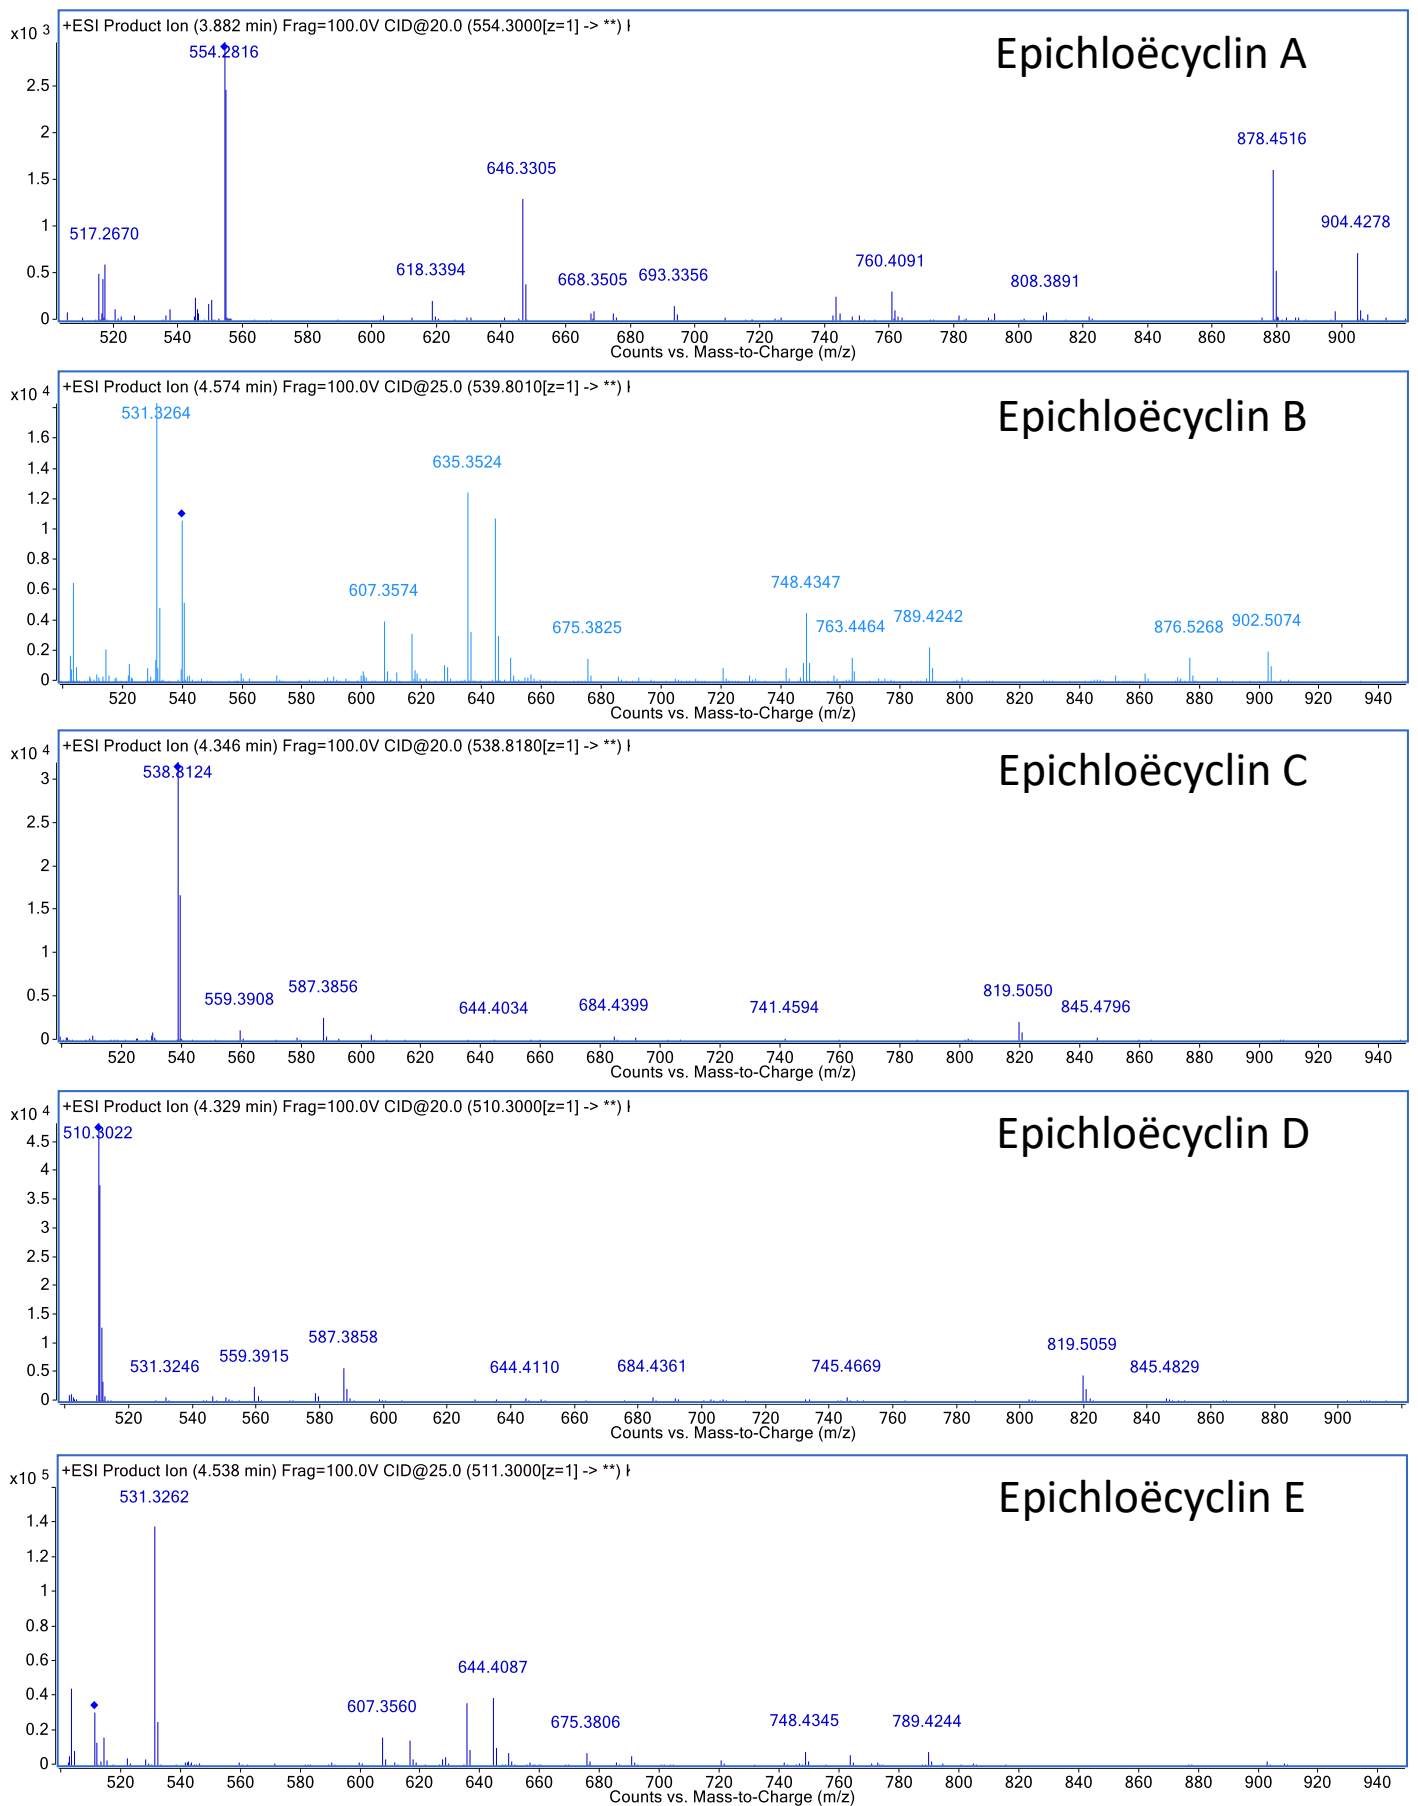

**Fig. S4** Confirmation of the identity of epichloëcyclins A-E by ultra high-performance liquid chromatography-quadrupole time-of-flight-mass spectrometry/mass spectrometry (UHPLC-

QTOF-MS/MS) analysis of the ions  $[2M+H]^{2+}$ . The fragment spectra shown here for epichloëcyclins A-E match the spectra described by **Johnson RD, Lane GA, Koulman A, Cao M, Fraser K, Fleetwood DJ, Voisey CR, Dyer JM, Pratt J, Christensen M, et al. 2015.** A novel family of cyclic oligopeptides derived from ribosomal peptide synthesis of an *in planta*-induced gene, *gigA*, in *Epichloë* endophytes of grasses. *Fungal Genetics and Biology* **85**: 14-24.

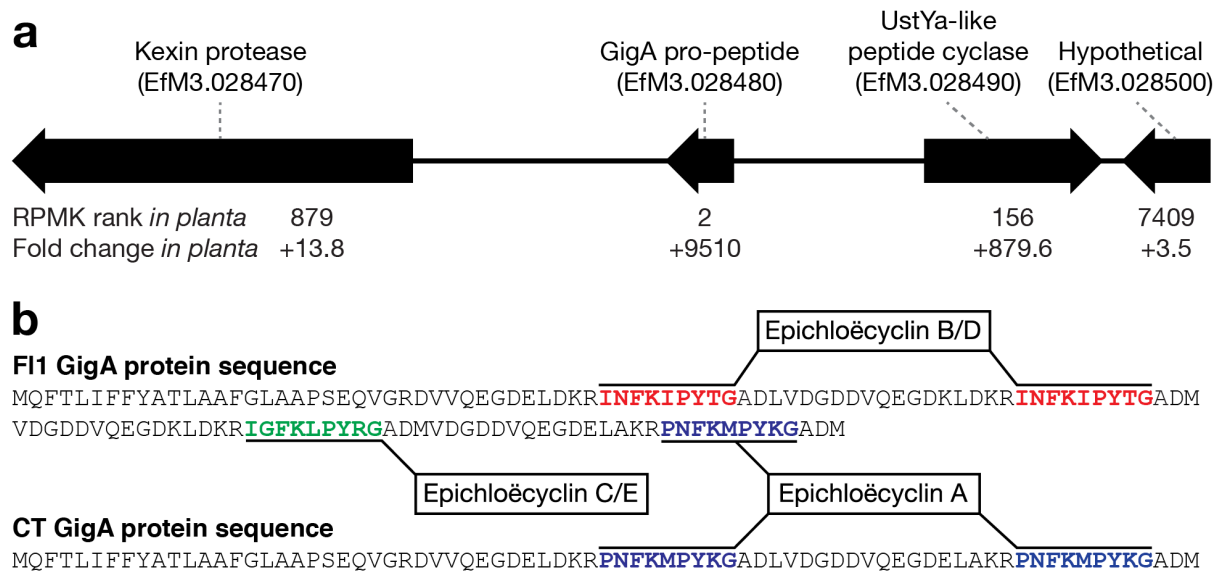

**Fig S5** *gigA* gene cluster and GigA protein sequences. (a) The *gigA* gene cluster annotated with gene expression level (ranked highest to lowest for all *E. festucae* genes expressed *in planta*) and fold change in expression *in planta* compared to axenic culture. The transcriptome data used here is available from the Sequence Read Archive (SRA) under Bioproject PRJNA447872. (b) GigA pro-peptide sequences from *E. festucae* strains F11 and CT annotated with the epichloëcyclin repeat sequences.



**a**

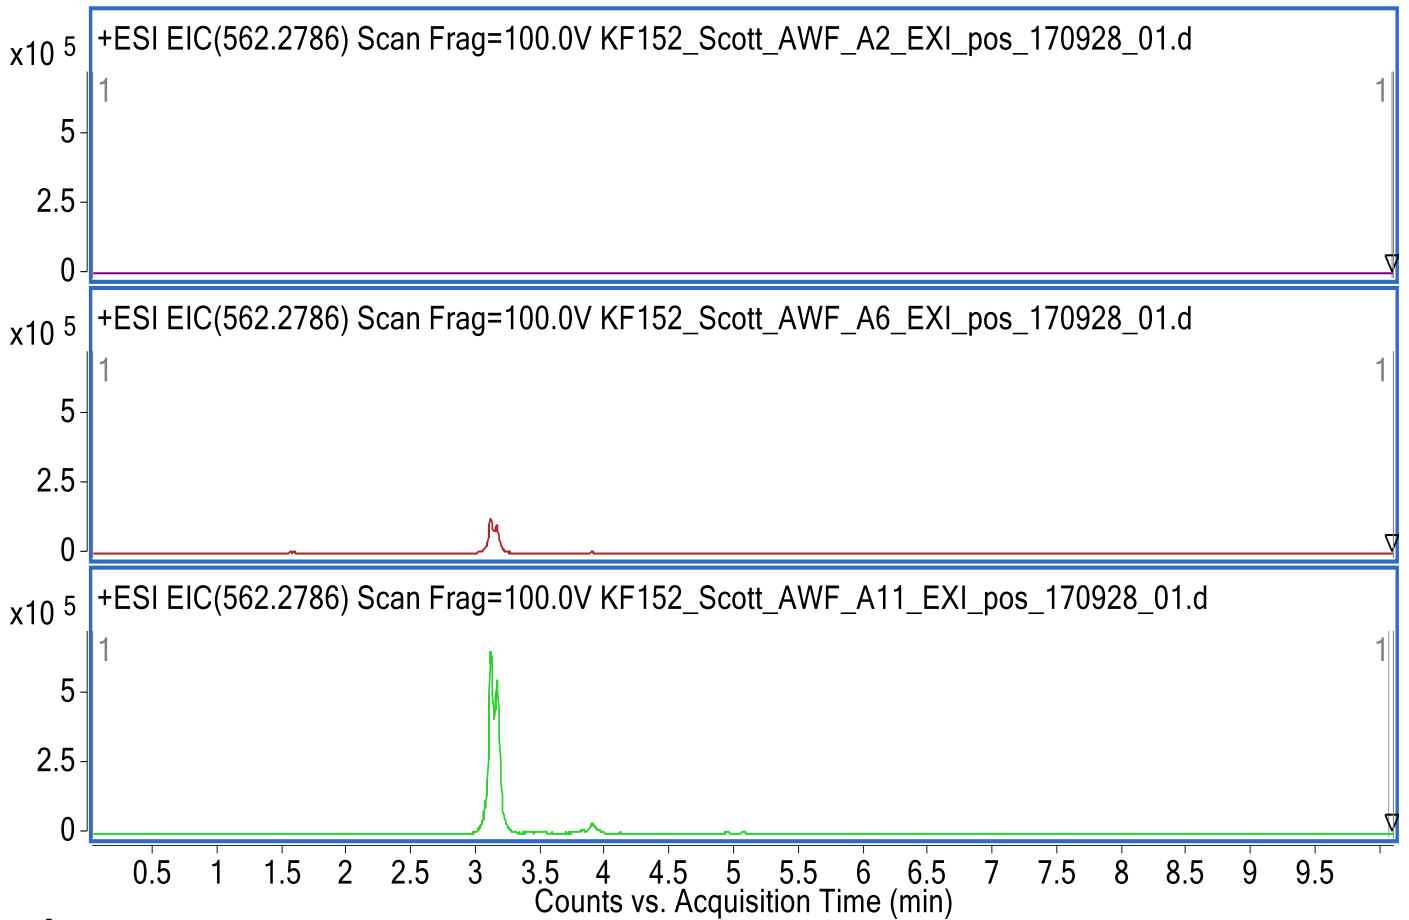

**b**

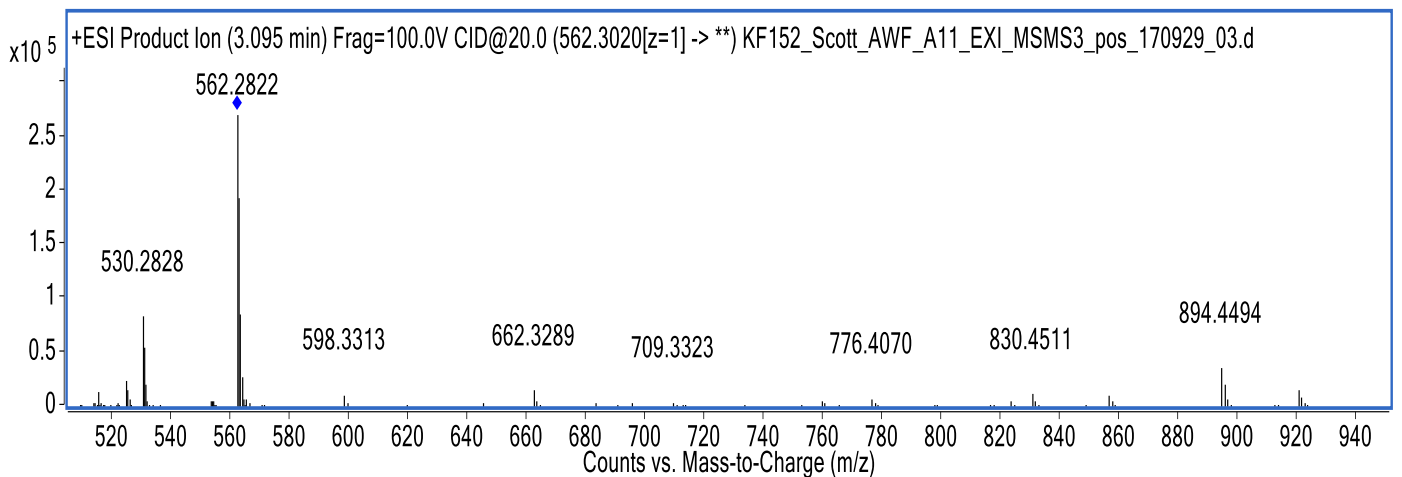

**Fig. S6** Extracted ion chromatogram of a putative peptide of  $[2M+H]^{2+}$  562.2786 (put. peptide 1), which is strongly enriched in CT. (a) Data are representative for five biological replicates per condition. (b) The fragment spectrum of this putative peptide 1 obtained by

ultra high-performance liquid chromatography-quadrupole time-of-flight-mass spectrometry/mass spectrometry (UHPLC-QTOF-MS/MS) analysis is shown.

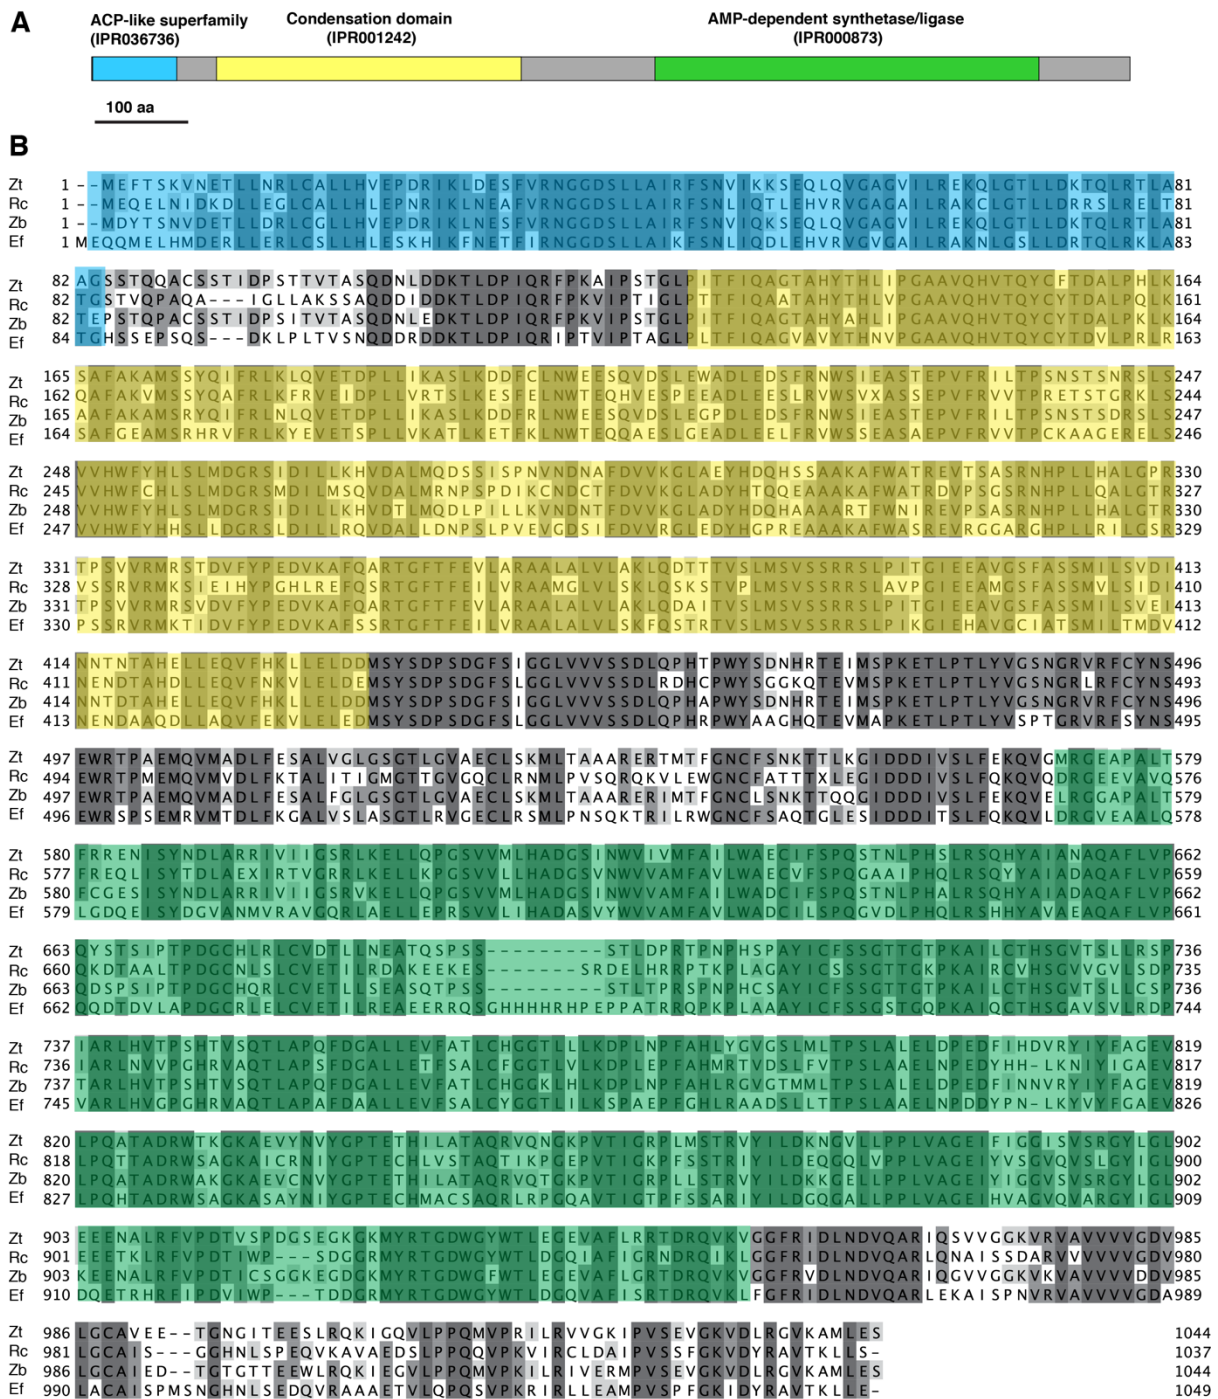

**Figure S7** LgsA predicted protein structure and multiple sequence alignment. (a) *Epichloë festucae* LgsA protein structure with respective InterproScan domains as indicated. Bar = 100 amino acids (aa). (b) Multiple sequence alignment of *E. festucae* (Ef) EfM3.056230, *Zyloseptoria tritici* (Zt) ZT1E4\_G1886, *Ramularia collo-cygni* (Rc) RCC\_03904, *Zyloseptoria brevis* (Zb) TI39\_contig403g00012-encoded proteins. Domains as per (a), are indicated.

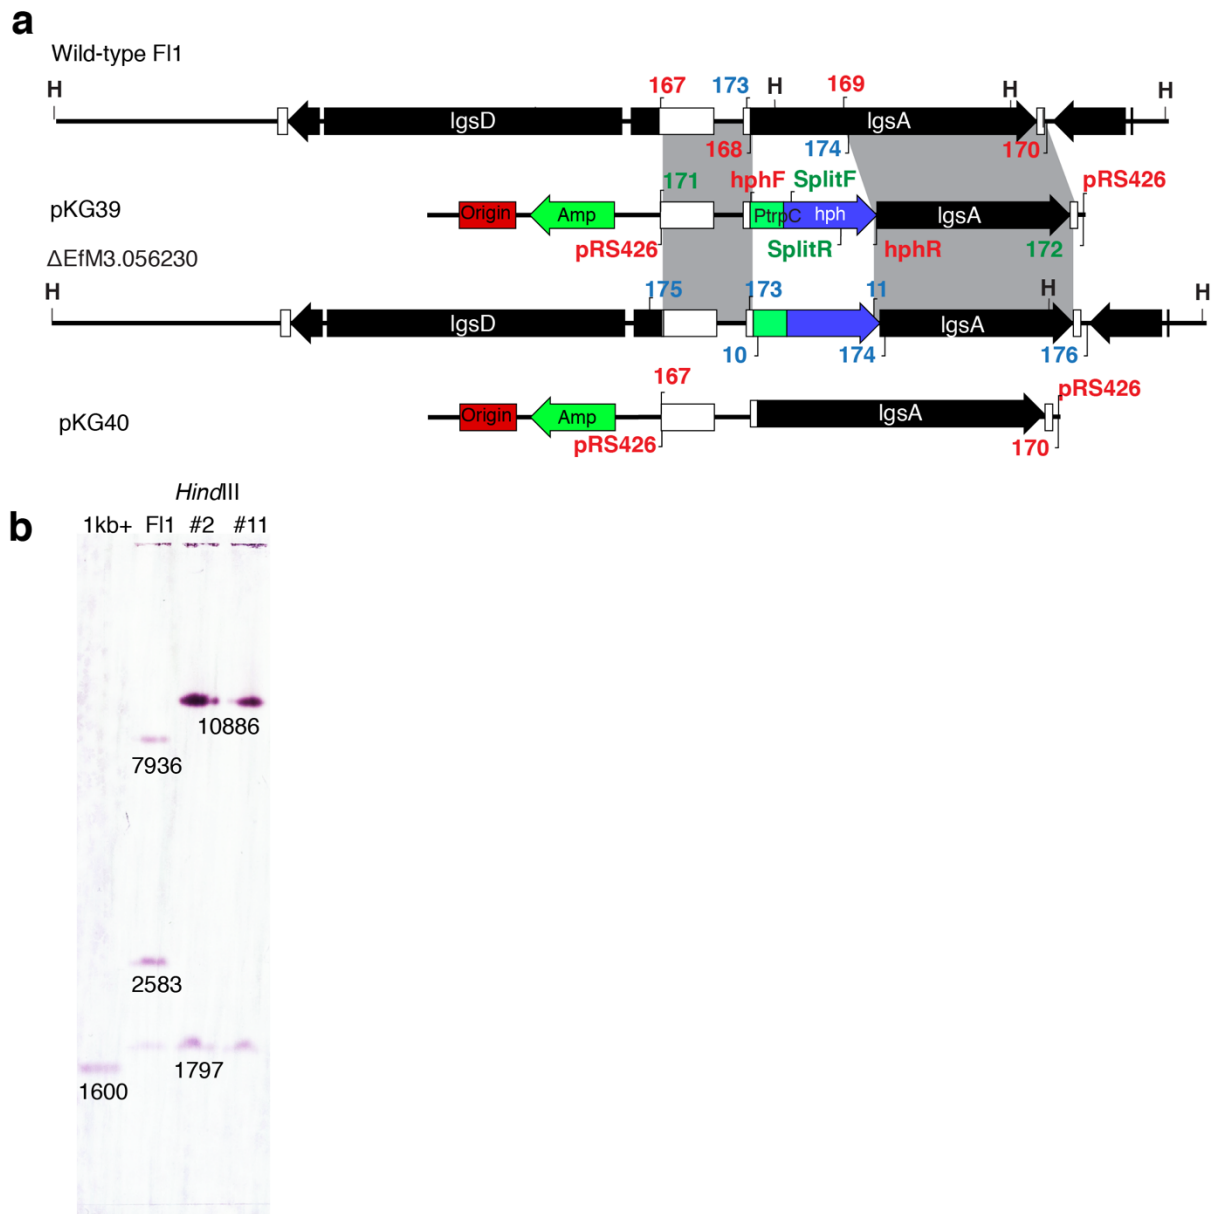

**Fig. S8** *lgsA* deletion and complementation construct design and strain screening. (a) Schematic of the WT (FI1) *lgsA* genomic locus and linear insert of *lgsA* deletion construct pKG39 and complementation construct pKG40. Regions of recombination are indicated by grey shading. *Hind*III(H) restriction enzyme sites used for Southern analysis and PCR primers used for Gibson assembly (red), split marker transformations (green) and knock-out screening (blue) are as shown. (b) nitro-blue tetrazolium/5-bromo-4 chloro-3'-indolyphosphate (NBT/BCIP)-stained Southern blot of *Hind*III genomic DNA digests (1.5  $\mu$ g) probed with digoxigenin (DIG)-11-dUTP-labeled linear pKG39 purified PCR fragment (primers 171/172). Fragments of the expected size are as shown.

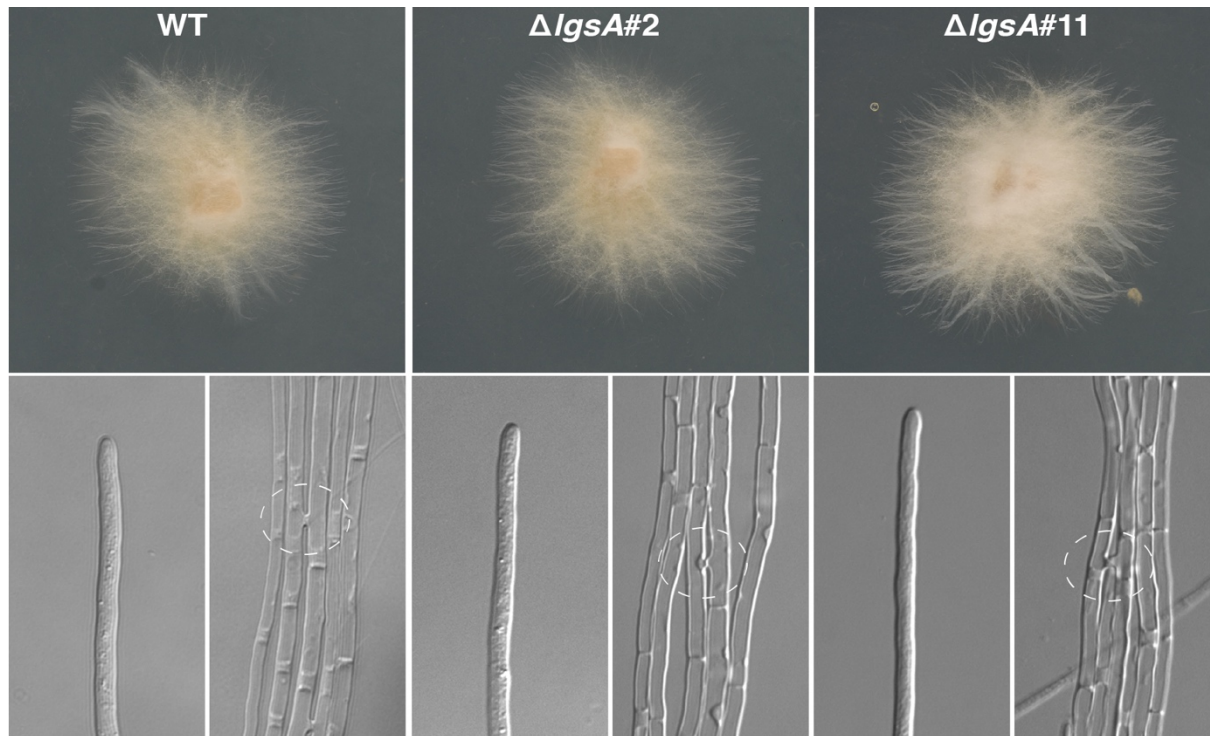

**Fig. S9** Culture morphology of WT and  $\Delta lgsA$  strains. Culture morphology of WT and  $\Delta lgsA$  strains grown on PD agar for seven days at 22°C (upper row). DIC images of hyphae undergoing cell-cell fusion on 1.5% water agar (highlighted by broken circles) in lower row. Bar = 20  $\mu\text{m}$ .

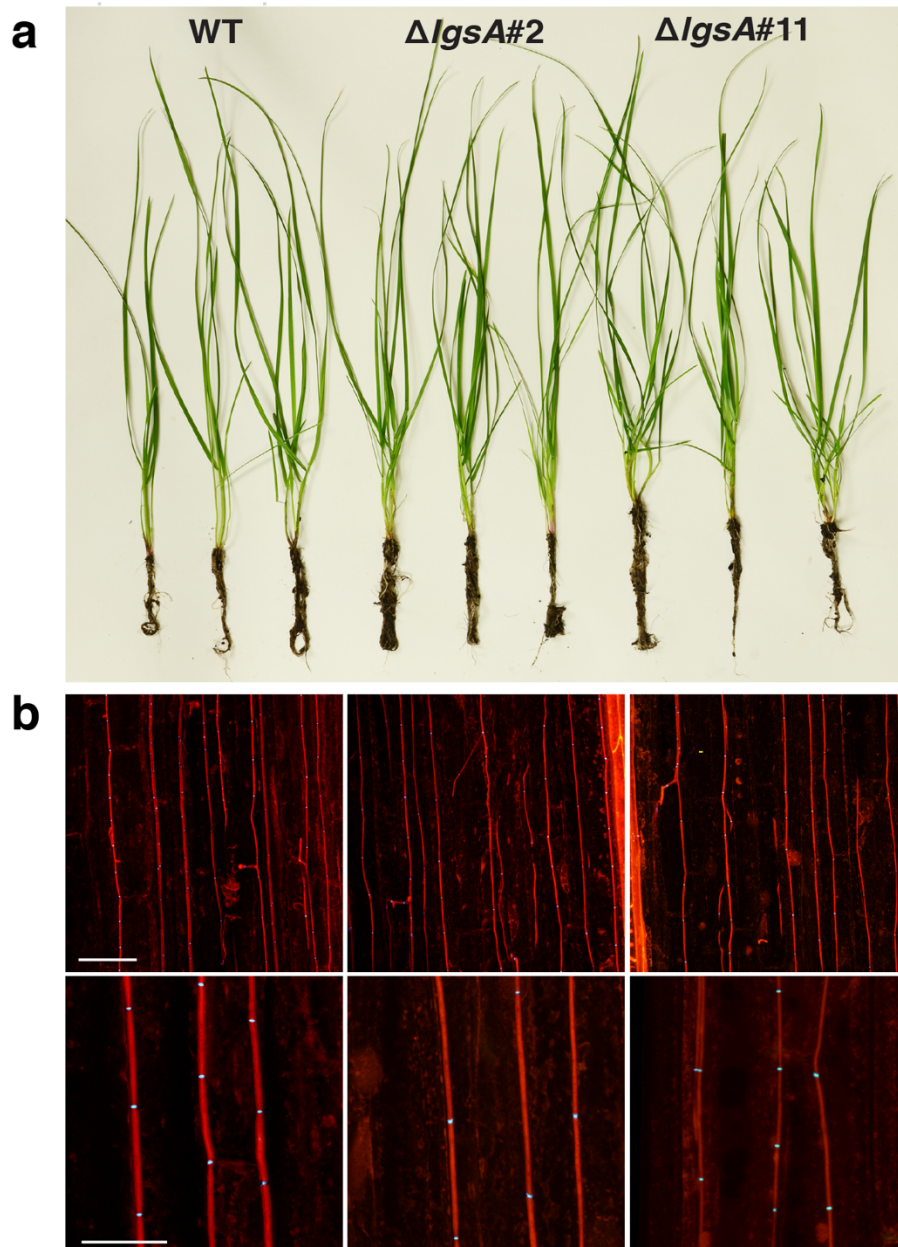

**Fig. S10** Host interaction and cellular phenotypes of *L. perenne* infected with WT and  $\Delta lgsA$  strains. (a) Host interaction phenotype of *L. perenne* plants infected with WT and  $\Delta lgsA$  strains at 8 weeks post planting. (b) Confocal depth series images of *L. perenne* leaf sheaths infected with WT and  $\Delta lgsA$  strains. Samples were stained with aniline blue, which detects  $\beta$ -glucans (red) and wheat germ agglutinin-alexa fluor 488 (WGA-AF488) which detects chitin (blue). Bar = 25  $\mu$ m.

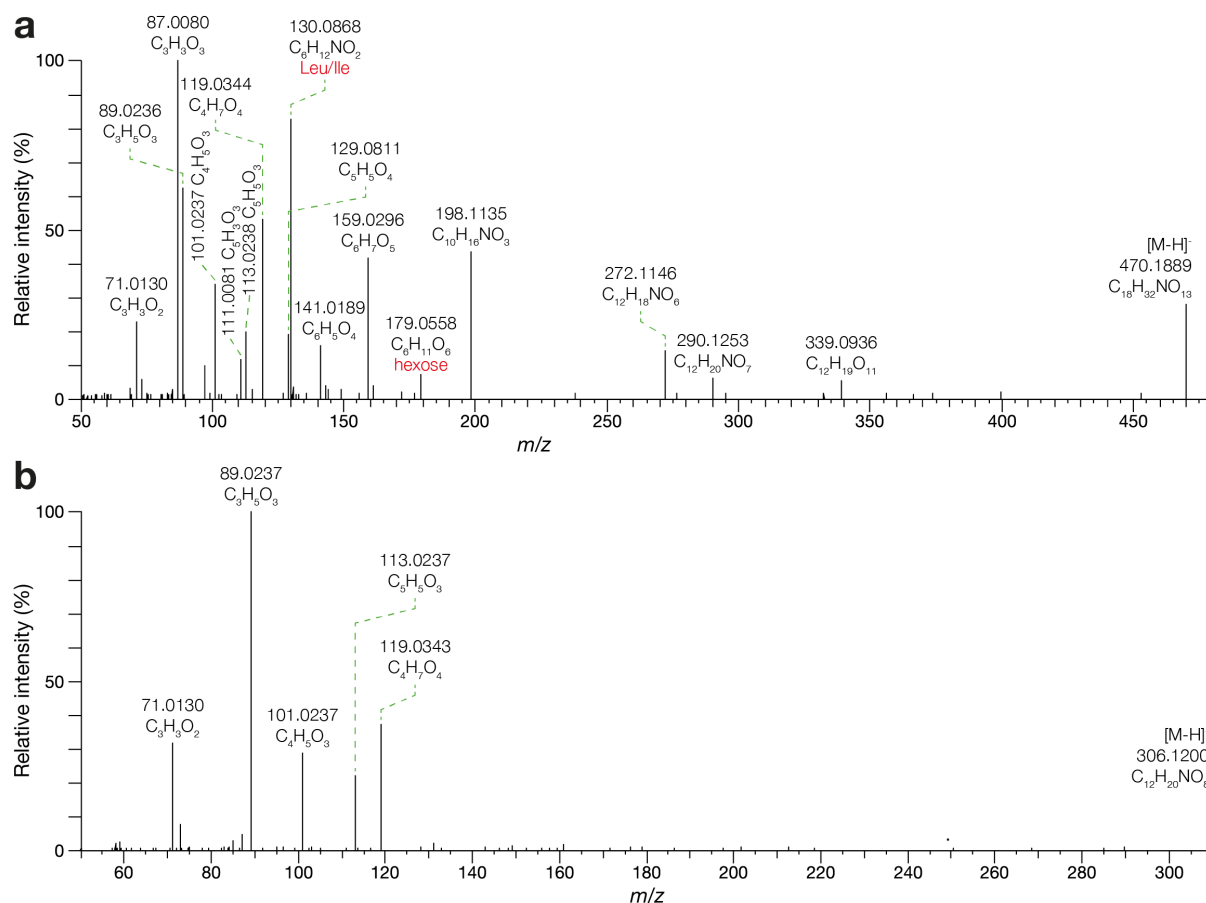

**Fig. S11** Negative mode ESI-MS/MS spectra. (a) High-resolution accurate mass negative electro spray ionisation-mass spectrometry/mass spectrometry (ESI-MS/MS) spectrum of the 470 *m/z* *E. festucae* LGS precursor ion fragmented by higher-energy collisional dissociation (HCD) at 20% energy. (b) High-resolution accurate mass negative ESI-MS/MS spectrum of the 306 *m/z* putative *Z. tritici* LGS precursor ion fragmented by HCD at 20% energy.

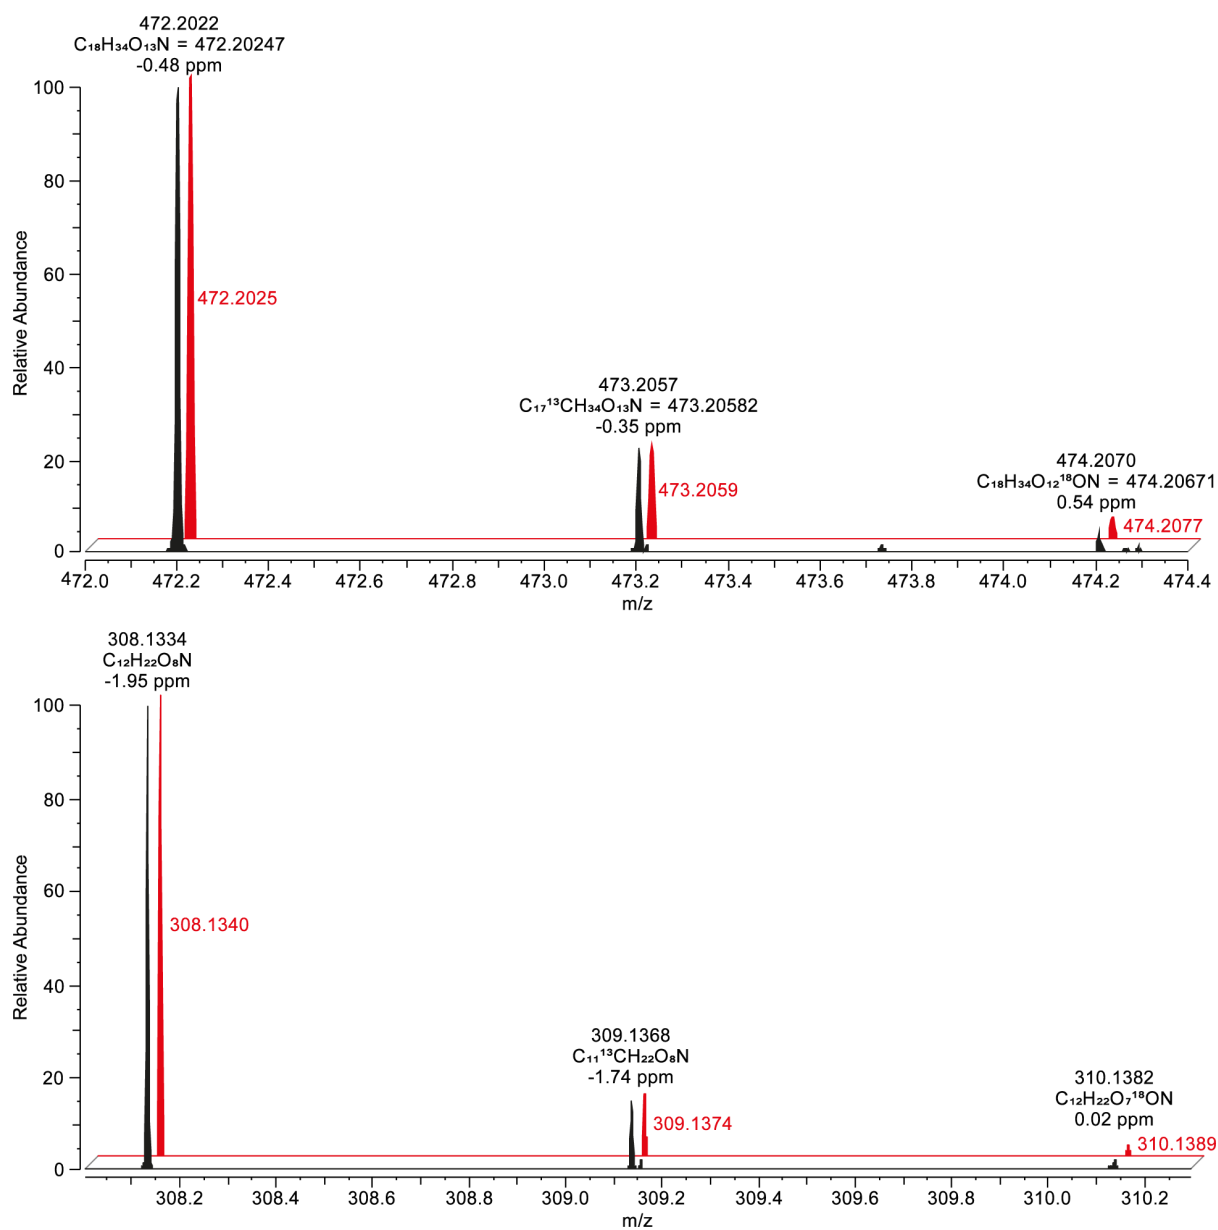

**Fig. S12** Observed (black) and simulated (red) isotope distributions for the 472  $m/z$  (top) and 308  $m/z$  (bottom) metabolites assuming molecular formulas of  $C_{18}H_{33}O_{13}N + H^+$  and  $C_{12}H_{21}O_8N + H^+$ , respectively. Isotope distribution simulations were performed using Thermo FreeStyle 1.6.



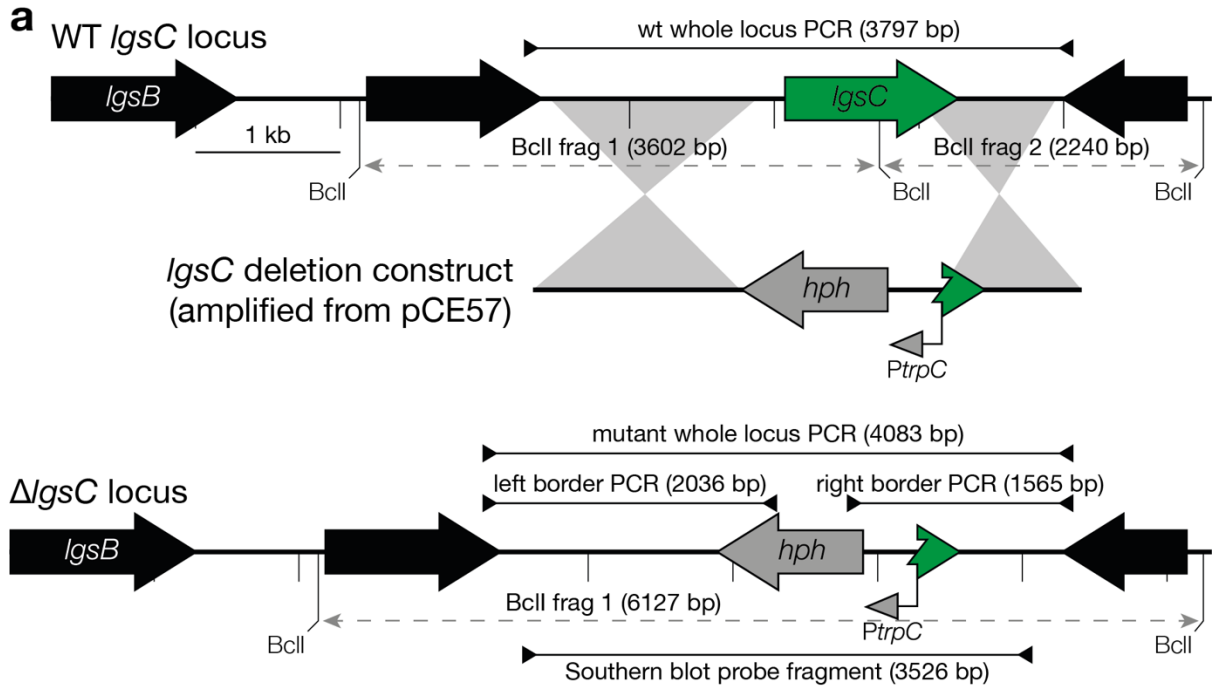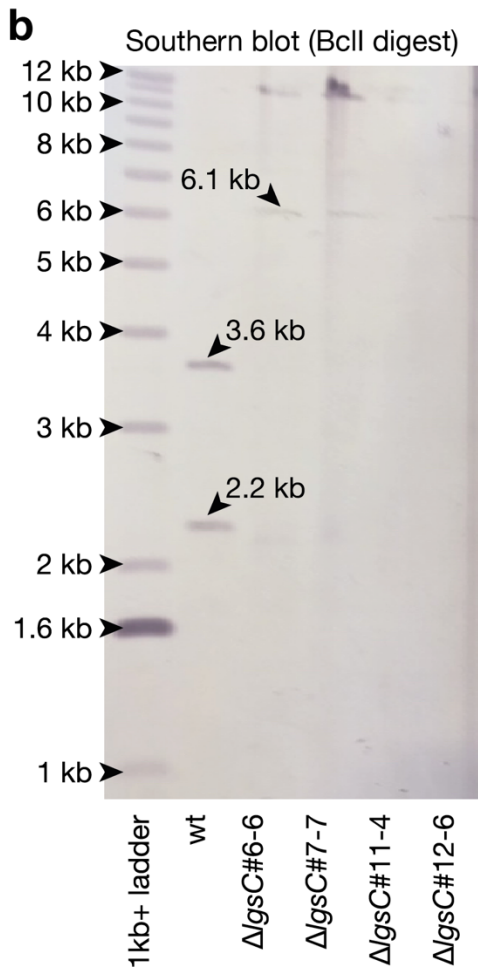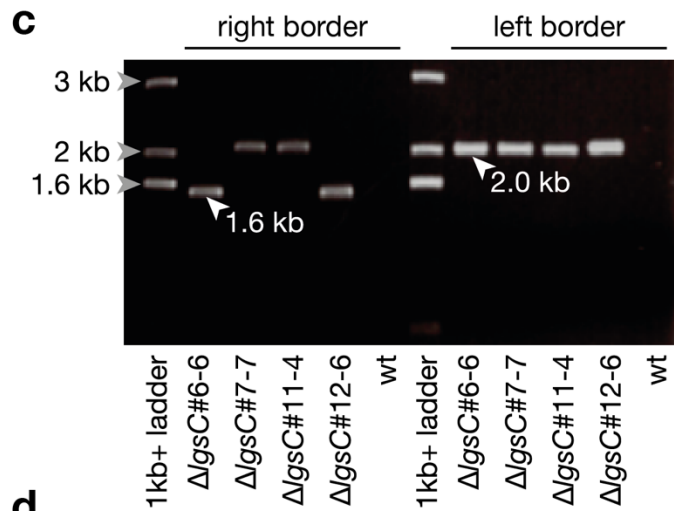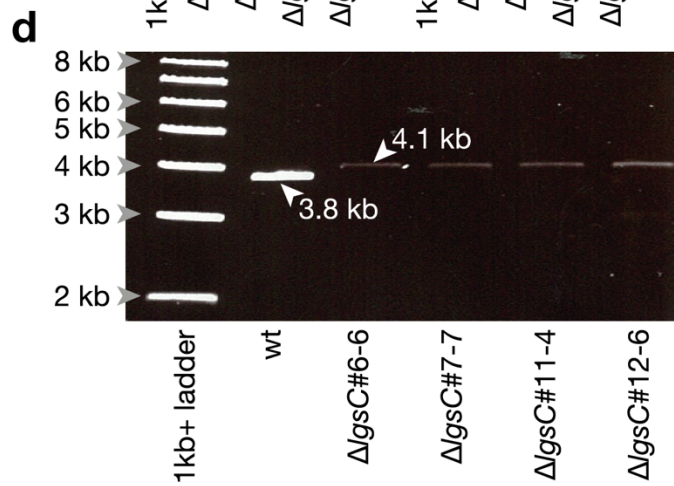

**Fig. S13** Strategy for deletion of *E. festucae* *lgsC*, Southern and PCR analysis. (a) Schematic of the *E. festucae* F11 (wild-type, WT) *lgsC* genomic locus, the linear *lgsC* deletion construct amplified from plasmid pCE57 using primers pRS426-cpsA-F and cpsA-pRS426-R, and the  $\Delta lgsC$  genomic locus. WT and mutant loci are annotated with *BcII* cut sites and amplified regions to aid interpretation of the Southern blot and PCR screening results, respectively. Homologous flanking regions enabling targeted recombination are indicated by grey shading. (b) nitro-blue tetrazolium/5-bromo-4-chloro-3'-indolyphosphate (NBT/BCIP)-stained Southern blot of *BcII*-digested genomic DNA (1.5  $\mu$ g per lane) probed with digoxigenin (DIG)-11-dUTP-labeled linear pCE57 purified PCR fragment (primers AR84/AR85). Fragments of the expected size are as shown. (c) Gel photo showing products of PCR amplification across the left (primers cps8/TC45) and right (TC44/cps7) flanking regions used to mediate integration at the target locus in four putative  $\Delta lgsC$  strains. No amplification of the WT control is expected. (d) Gel photo showing products of PCR amplification (primers cps7/cps8) across the entire  $\Delta lgsC$  integration site. Amplification of *lgsC* is expected for the WT control.

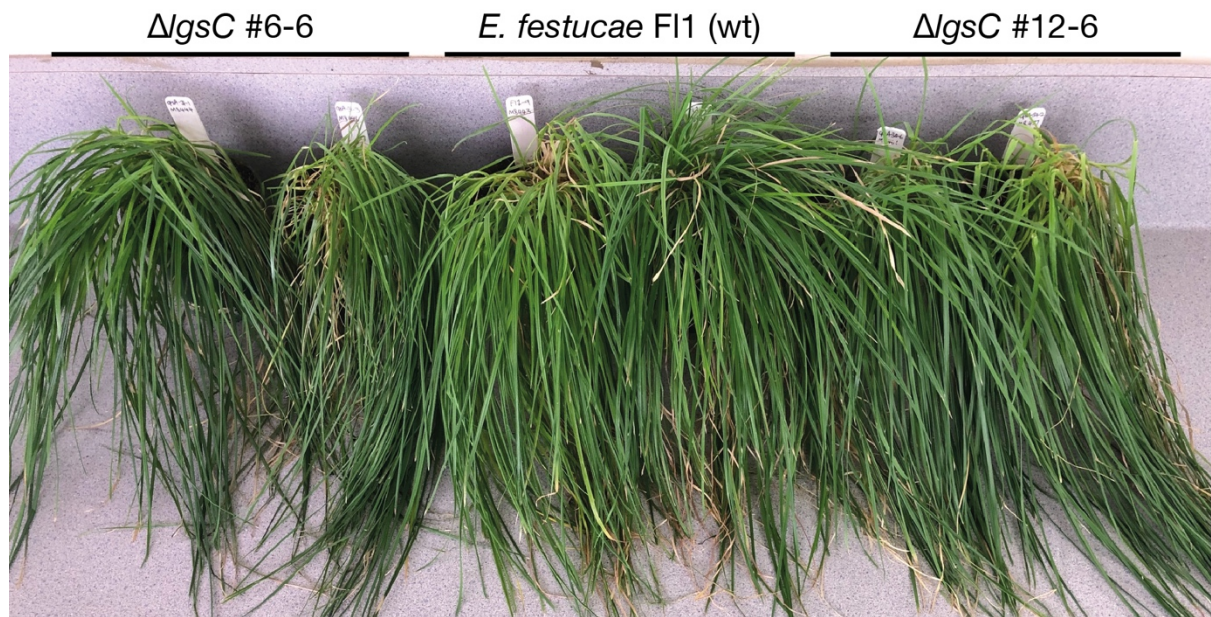

**Fig. S14** Host interaction phenotype of *L. perenne* infected with WT and  $\Delta lgsC$  strains. Host interaction phenotype of *L. perenne* plants infected with WT and  $\Delta lgsC$  strains #6-6 and #12-6 several months post-planting.

**Table S1** Biological material.

**Table S2** Primers used in this study.

**Table S3** Data matrix of raw data obtained by UPLC-ESI-TOF-MS-based metabolite fingerprinting analysis of the polar extraction phase, analysed in positive ESI-mode.

**Table S4** Data matrix of raw data obtained by UPLC-ESI-TOF-MS-based metabolite fingerprinting analysis of the polar extraction phase, analysed in negative ESI-mode.

**Table S5** Data matrix of raw data obtained by UPLC-ESI-TOF-MS-based metabolite fingerprinting analysis of the non-polar extraction phase, analysed in positive ESI-mode.

**Table S6** Data matrix of raw data obtained by UPLC-ESI-TOF-MS-based metabolite fingerprinting analysis of the non-polar extraction phase, analysed in negative ESI-mode.

**Table S7** Data matrix of 203 high quality metabolite features (false discovery rate < 0.003) obtained by metabolite fingerprinting (UPLC-ESI-TOF-MS analysis) of apoplastic wash fluids from mock-treated, FI1- or CT-infected *L. perenne*.

**Table S8** Infection markers identified by metabolite fingerprinting (UPLC-ESI-TOF-MS analysis) and verified by UHPLC-ESI-QTOF-MS/MS analysis or coelution.

**Table S9** *Epichloë* metabolite database

**Table S10** Differences in expression of *lgs* cluster genes *in planta* compared to axenic culture.
